# Supplementary material for: Building Ultrathin Li4Mn5O12 Shell for Enhancing the Stability of Cobalt-Free Lithium-Rich Manganese Cathode Materials
Source: MDPI journal article supplement (doi:10.3390/batteries9020123), 2023-02-09
Supplement: s1 [file s1]

---

## Supplementary Information

### **Buliding ultrathin $\text{Li}_4\text{Mn}_5\text{O}_{12}$ shell for enhancing the stability of cobalt-free lithium-rich manganese cathode materials**

Yuhong Qiu <sup>a b</sup>, Xuefeng Peng <sup>a</sup>, Lichun Zhou <sup>b</sup>, Jie Yan <sup>a</sup>, Yaochen Song <sup>a b</sup>,  
Linnan Bi <sup>a b</sup>, Xin Long <sup>a b</sup>, Liang He <sup>b</sup>, Qingyu Xie <sup>b</sup>, Sizhe Wang <sup>\*b c</sup>, Jiaxuan Liao <sup>\*a b</sup>

<sup>a</sup> School of Materials and Energy, University of Electronic Science and Technology of China, Chengdu 611731, P. R. China

<sup>b</sup> Yangtze Delta Region Institute (QuZhou), University of Electronic Science and Technology of China, 324000, P. R. China

<sup>c</sup> School of Materials Science and Engineering, Shaanxi Key Laboratory of Green Preparation and Functionalization for Inorganic Materials, Shaanxi University of Science & Technology, Xi'an 710021, P. R. China

\* Corresponding authors.

E-mail addresses: kevinwang@sust.edu.cn (S. Wang); jxliao@uestc.edu.cn (J. Liao)

---

**Table S1.** Lattice parameters and characteristic peak ratios of the LNM、

LMO@LNM-1%、 LMO@LNM-3% and LMO@LNM-5%

| Samples    | $a/\text{\AA}$ | $c/\text{\AA}$ | $c/a$  | $I_{(003)}/I_{(104)}$ |
|------------|----------------|----------------|--------|-----------------------|
| LNM        | 2.8772         | 14.3398        | 4.9839 | 1.7426                |
| LMO@LNM-1% | 2.8707         | 14.2839        | 4.9758 | 1.7622                |
| LMO@LNM-3% | 2.8889         | 14.3719        | 4.9749 | 1.8184                |
| LMO@LNM-5% | 2.8939         | 14.2826        | 4.9354 | 1.8743                |

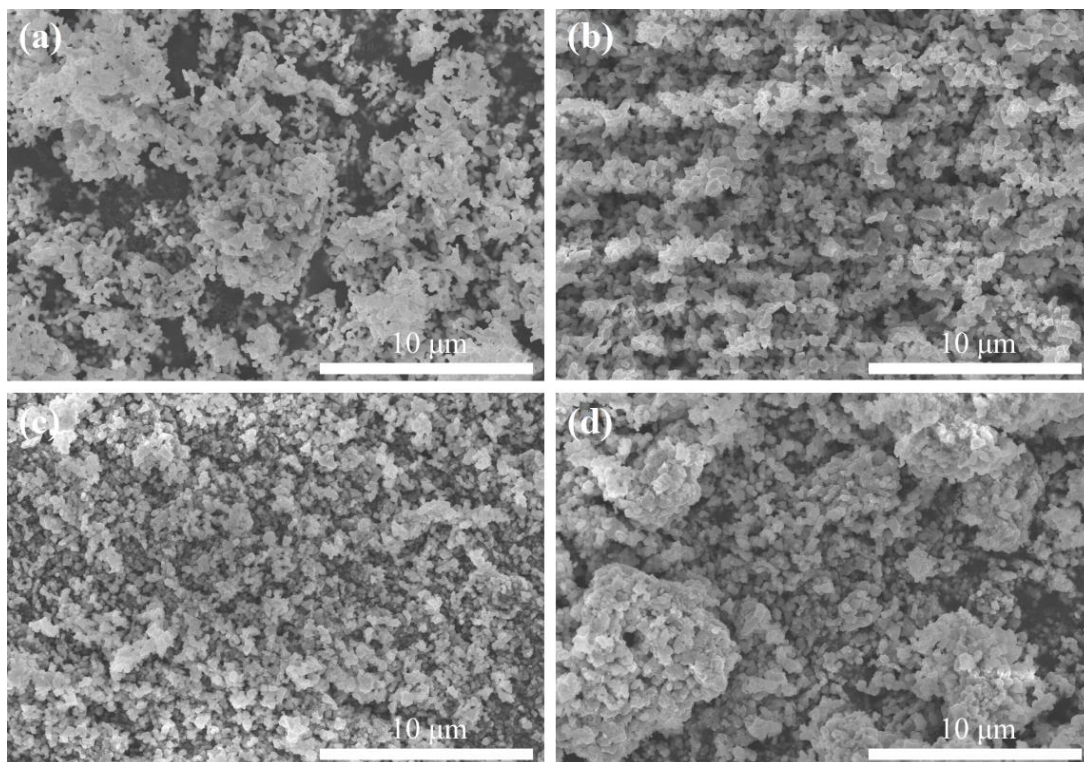

**Figure S1.** Low magnification SEM images of (a) LNM, (b) LMO@LNM-1%, (c) LMO@LNM-3%, (d) LMO@LNM-5%.

---

**Table S2.** Fitted impedance parameters, weber coefficients, and lithium-ion diffusion coefficients for the samples.

| sample     | $R_e/\Omega$ | $R_{ct}/\Omega$ | $\sigma/\Omega\cdot\text{cm}^2\cdot\text{s}^{-1/2}$ | $D_{Li^+}/\text{cm}^2\cdot\text{s}^{-1}$ |
|------------|--------------|-----------------|-----------------------------------------------------|------------------------------------------|
| LNM        | 9.544        | 31.46           | 36.750                                              | $8.32\times 10^{-15}$                    |
| LMO@LNM-1% | 6.720        | 273.0           | 83.060                                              | $1.63\times 10^{-15}$                    |
| LMO@LNM-3% | 2.929        | 192.6           | 35.026                                              | $9.16\times 10^{-15}$                    |
| LMO@LNM-5% | 5.469        | 346.6           | 121.91                                              | $6.98\times 10^{-15}$                    |

---
